# Supplementary material for: Protein tyrosine phosphatase receptor-type δ acts as a negative regulator suppressing breast cancer
Source: PubMed Central journal article supplement (PMC5716768; doi:10.18632/oncotarget.22000), 2017-10-24
Supplement: oncotarget-08-98798-s001.pdf [file oncotarget-08-98798-s001.pdf]

# Protein tyrosine phosphatase receptor-type $\delta$ acts as a negative regulator suppressing breast cancer

## SUPPLEMENTARY MATERIALS

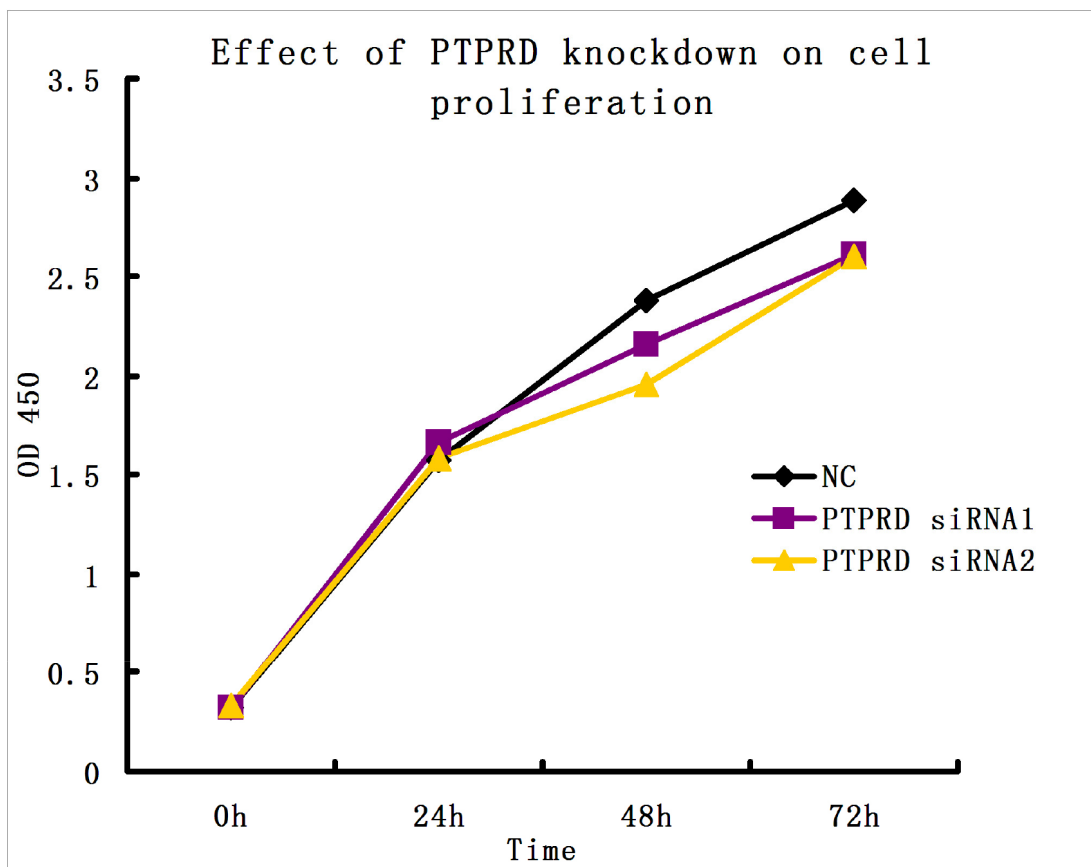

**Supplementary Figure 1: Proliferation (CCK 8) assay in MDA-MB-231 cells transfected with NC or PTPRD siRNAs.** No significant differences in cell proliferation rates were detected between the PTPRD siRNA and the NC siRNA groups.

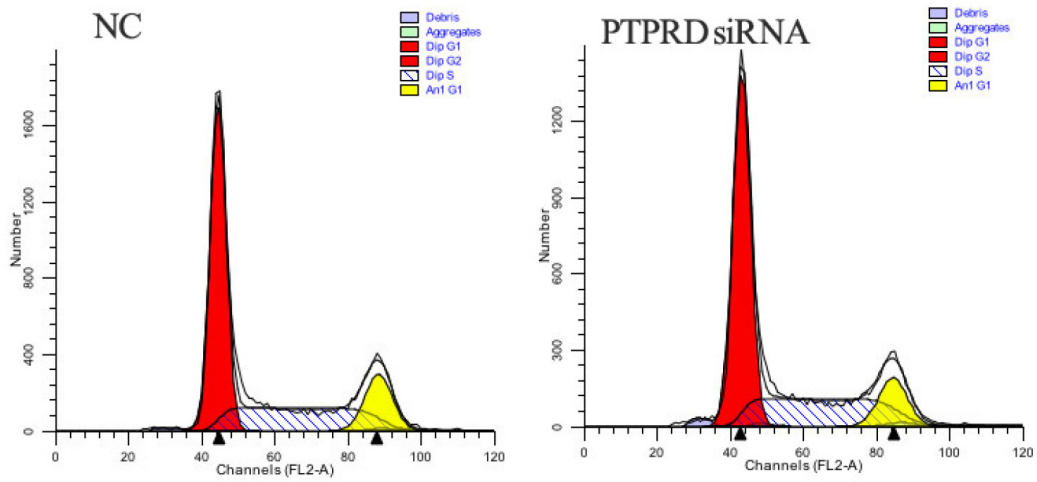

**Supplementary Figure 2: Cell cycle staging evaluation in MDA-MB-231 cells transfected with NC or PTPRD siRNAs.** PI (Propidium iodide)-stained cells were analyzed by fluorescence-activated cell sorting. No significant differences in cell cycle distribution between the two groups were found.
